# Supplementary material for: Biological invasions as a selective filter driving behavioral divergence
Source: PubMed Central journal article supplement (PMC9553908; doi:10.1038/s41467-022-33755-2), 2022-10-11
Supplement: 41467_2022_33755_MOESM1_ESM.pdf [file 41467_2022_33755_MOESM1_ESM.pdf]

## Supplementary Information for

### **Biological invasions as a selective filter driving behavioral divergence**

David G. Chapple<sup>1,#\*</sup>, Annalise C. Naimo<sup>1\*</sup>, Jack A. Brand<sup>1\*</sup>, Marcus Michelangeli<sup>1,2,3</sup>, Jake M. Martin<sup>1,3</sup>, Celine T. Goulet<sup>1</sup>, Dianne H. Brunton<sup>4</sup>, Andrew Sih<sup>2</sup>, and Bob B.M. Wong<sup>1</sup>.

#Correspondence to: [David.Chapple@monash.edu](mailto:David.Chapple@monash.edu)

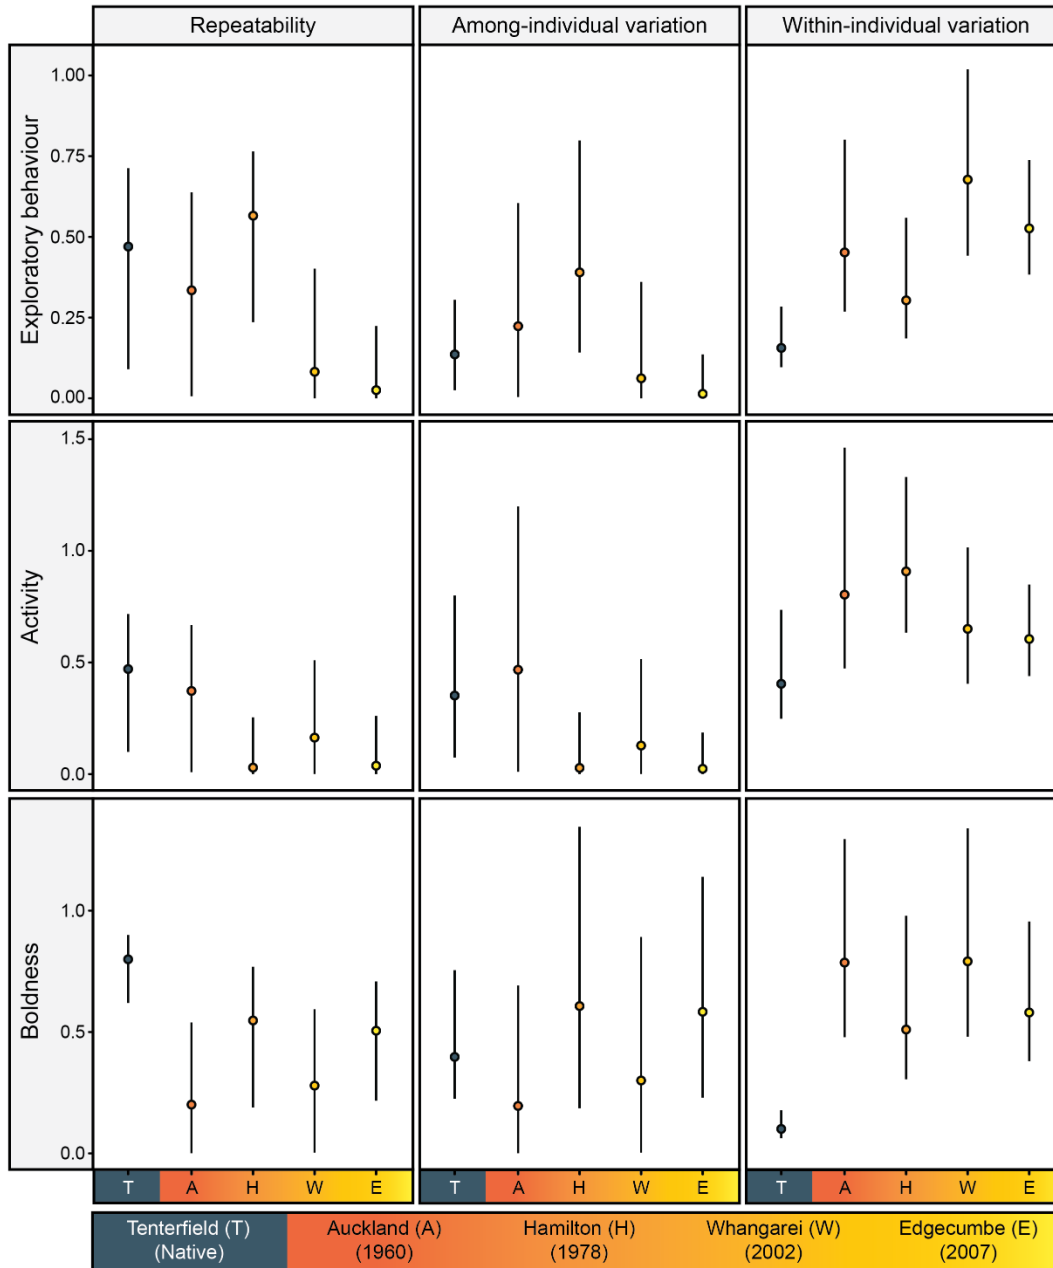

**Supplementary Fig. 1.** Adjusted repeatability and variance estimates (among- and within-individual) for exploratory behavior (i.e. time spent exploring the barrier), activity (i.e. the number of transitions between grid squares), and boldness (i.e. re-emergence latency; axis inverted) of skinks from the native Tenterfield source population (grey;  $n = 30$  skinks), and invasive New Zealand skinks from Auckland (red;  $n = 31$ ), Hamilton (orange;  $n = 43$ ), Whangarei (light-orange;  $n = 33$ ), and Edgecumbe (yellow;  $n = 36$ ). For each graph, filled circles represent the median variance/repeatability estimates extracted from linear mixed-effects models, while vertical error bars denote 95% credible intervals. Source data are provided as a Source Data file.

**Supplementary Table 1.** The number of lizards collected from each population across the species native (i.e., Australia) and invasive (i.e., Hawaii, Lord Howe Island, and New Zealand) ranges.

| <b>Region</b>    | <b>Population</b> | <b>Establishment date</b> | <b>Number of skinks in each population</b> | <b>Number of skinks in each region</b> |
|------------------|-------------------|---------------------------|--------------------------------------------|----------------------------------------|
| Australia        | Brisbane          | Native                    | 27                                         |                                        |
| Australia        | Coffs Harbour     | Native                    | 81                                         | 167                                    |
| Australia        | Sydney            | Native                    | 29                                         |                                        |
| Australia        | Tenterfield       | Native                    | 30                                         |                                        |
| Hawaii           | Koke'e            | ~1960                     | 39                                         |                                        |
| Hawaii           | Honolulu          | 1905                      | 37                                         | 118                                    |
| Hawaii           | Volcano           | ~1960                     | 42                                         |                                        |
| Lord Howe Island | Boardwalk         | ~1980                     | 26                                         |                                        |
| Lord Howe Island | Middle Beach      | ~1980                     | 30                                         | 92                                     |
| Lord Howe Island | North Bay         | ~1980                     | 36                                         |                                        |
| New Zealand      | Auckland          | ~1960                     | 31                                         |                                        |
| New Zealand      | Hamilton          | 1978                      | 43                                         | 143                                    |
| New Zealand      | Whangarei         | 2002                      | 33                                         |                                        |
| New Zealand      | Edgecumbe         | 2007                      | 36                                         |                                        |

**Supplementary Table 2.** Experimental timeline of behavioral trials. Skinks underwent two trials of activity, exploratory behavior, and boldness, each four days apart. Note: some lizards performed behavioral tests seven days apart due to logistical constraints.

| Experimental day |                  |                     |                  |       |                  |                     |                  |
|------------------|------------------|---------------------|------------------|-------|------------------|---------------------|------------------|
| Week             | Day 1            | Day 2               | Day 3            | Day 4 | Day 5            | Day 6               | Day 7            |
| 1                | Activity trial 1 |                     |                  |       | Activity trial 2 |                     |                  |
| 2                |                  | Exploration trial 1 |                  |       |                  | Exploration trial 2 |                  |
| 3                |                  |                     | Boldness trial 1 |       |                  |                     | Boldness trial 1 |

**Supplementary Table 3.** Model comparison table comparing the relative fits of four models investigating differences in exploration among both native and invasive regions.

| <b>Model</b>     | <b>WAIC</b> | <b>Se WAIC</b> | <b><math>\Delta</math> WAIC</b> | <b>LOO</b> | <b>Se LOO</b> | <b><math>\Delta</math> LOO</b> |
|------------------|-------------|----------------|---------------------------------|------------|---------------|--------------------------------|
| Both<br>variance | 2403.0      | 63.1           | 0                               | 2432.8     | 64.9          | 0                              |
| Within<br>model  | 2403.9      | 60.3           | -0.9                            | 2433.1     | 62.0          | -0.3                           |
| Null<br>model    | 2430.8      | 59.7           | -27.8                           | 2451.3     | 60.7          | -18.5                          |
| Among<br>model   | 2442.4      | 61.3           | -39.4                           | 2461.0     | 62.1          | -28.2                          |

**Supplementary Table 4.** Model comparison table comparing the relative fits of four models investigating differences in activity rates among both native and invasive regions.

| <b>Model</b>     | <b>WAIC</b> | <b>Se WAIC</b> | <b><math>\Delta</math> WAIC</b> | <b>LOO</b> | <b>Se LOO</b> | <b><math>\Delta</math> LOO</b> |
|------------------|-------------|----------------|---------------------------------|------------|---------------|--------------------------------|
| Both<br>variance | 2505.6      | 47.7           | 0                               | 2550.2     | 50.1          | 0                              |
| Within<br>model  | 2518.2      | 46.3           | -12.6                           | 2561.3     | 48.3          | -11.1                          |
| Among<br>model   | 2532.8      | 48.4           | -27.2                           | 2569.5     | 50.0          | -19.3                          |
| Null<br>model    | 2538.8      | 47.1           | -33.2                           | 2578.8     | 49.0          | -28.6                          |

**Supplementary Table 5.** Model comparison table comparing the relative fits of four models investigating differences in boldness among both native and invasive regions.

| <b>Model</b>     | <b>WAIC</b> | <b>Se WAIC</b> | <b><math>\Delta</math> WAIC</b> | <b>LOO</b> | <b>Se LOO</b> | <b><math>\Delta</math> LOO</b> |
|------------------|-------------|----------------|---------------------------------|------------|---------------|--------------------------------|
| Both<br>variance | 2177.4      | 43.0           | 0                               | 2232.1     | 45.1          | 0                              |
| Within<br>model  | 2183.0      | 42.9           | -5.6                            | 2234.4     | 44.9          | -2.3                           |
| Null<br>model    | 2272.1      | 42.2           | -94.7                           | 2311.0     | 43.7          | -78.9                          |
| Among<br>model   | 2277.9      | 42.9           | -100.5                          | 2313.7     | 44.4          | -81.6                          |

**Supplementary Table 6.** Model summary of average differences in exploratory behavior between Australia (i.e. intercept;  $n = 167$  skinks), and Hawaii ( $n = 118$ ) Lord Howe Island ( $n = 92$ ), and New Zealand ( $n = 143$ ).

| Term             | Estimate      | SE           | Lower 95% CI  | Upper 95% CI  |
|------------------|---------------|--------------|---------------|---------------|
| Intercept        | <b>-0.644</b> | <b>0.165</b> | <b>-0.955</b> | <b>-0.293</b> |
| Hawaii           | <b>1.099</b>  | <b>0.248</b> | <b>0.573</b>  | <b>1.563</b>  |
| Lord Howe Island | <b>0.606</b>  | <b>0.252</b> | <b>0.076</b>  | <b>1.077</b>  |
| New Zealand      | <b>0.954</b>  | <b>0.233</b> | <b>0.465</b>  | <b>1.398</b>  |

Estimates in bold are those with 95% CI's that did not include zero.



**Supplementary Table 7.** Model summary of average differences in activity rates between Australia (i.e. intercept;  $n = 167$  skinks), and Hawaii ( $n = 118$ ) Lord Howe Island ( $n = 92$ ), and New Zealand ( $n = 143$ ).

| <b>Term</b>      | <b>Estimate</b> | <b>SE</b> | <b>Lower 95% CI</b> | <b>Upper 95% CI</b> |
|------------------|-----------------|-----------|---------------------|---------------------|
| Intercept        | -0.173          | 0.165     | -0.501              | 0.165               |
| Hawaii           | 0.364           | 0.258     | -0.152              | 0.868               |
| Lord Howe Island | -0.205          | 0.258     | -0.724              | 0.314               |
| New Zealand      | 0.434           | 0.233     | -0.029              | 0.895               |

**Supplementary Table 8.** Model summary of average differences in boldness between Australia (i.e. intercept;  $n = 167$  skinks), and Hawaii ( $n = 118$ ) Lord Howe Island ( $n = 92$ ), and New Zealand ( $n = 143$ ). Note: as boldness was measured as re-emergence latencies, lower scores indicate bolder lizards.

| Term             | Estimate      | SE           | Lower 95% CI  | Upper 95% CI  |
|------------------|---------------|--------------|---------------|---------------|
| Intercept        | 0.128         | 0.085        | -0.044        | 0.299         |
| Hawaii           | 0.030         | 0.129        | -0.216        | 0.292         |
| Lord Howe Island | 0.269         | 0.150        | -0.029        | 0.566         |
| New Zealand      | <b>-0.597</b> | <b>0.137</b> | <b>-0.864</b> | <b>-0.325</b> |

Estimates in bold are those with 95% CI's that did not include zero.

**Supplementary Table 9.** Adjusted repeatability (R) and variance estimates (i.e., among-individual [ $V_A$ ] and within-individual [ $V_W$ ]) for exploratory behavior in Australia ( $n = 167$  skinks), and Hawaii ( $n = 118$ ) Lord Howe Island ( $n = 92$ ), and New Zealand ( $n = 143$ ).

| Region           | Estimate | Value | Lower 95% CI | Upper 95% CI |
|------------------|----------|-------|--------------|--------------|
| Australia        | R        | 0.44  | 0.31         | 0.56         |
| Australia        | $V_A$    | 0.34  | 0.22         | 0.47         |
| Australia        | $V_W$    | 0.34  | 0.27         | 0.42         |
| Hawaii           | R        | 0.15  | 0.00         | 0.29         |
| Hawaii           | $V_A$    | 0.13  | 0.00         | 0.27         |
| Hawaii           | $V_W$    | 0.64  | 0.48         | 0.82         |
| Lord Howe Island | R        | 0.09  | 0.00         | 0.24         |
| Lord Howe Island | $V_A$    | 0.09  | 0.00         | 0.24         |
| Lord Howe Island | $V_W$    | 0.79  | 0.58         | 1.01         |
| New Zealand      | R        | 0.18  | 0.00         | 0.31         |
| New Zealand      | $V_A$    | 0.15  | 0.00         | 0.26         |
| New Zealand      | $V_W$    | 0.57  | 0.43         | 0.72         |

**Supplementary Table 10.** Adjusted repeatability (R) and variance estimates (i.e., among-individual [ $V_A$ ] and within-individual [ $V_W$ ]) for activity rates in Australia ( $n = 167$  skinks), and Hawaii ( $n = 118$ ) Lord Howe Island ( $n = 92$ ), and New Zealand ( $n = 143$ ).

| Region           | Estimate | Value | Lower 95% CI | Upper 95% CI |
|------------------|----------|-------|--------------|--------------|
| Australia        | R        | 0.44  | 0.32         | 0.57         |
| Australia        | $V_A$    | 0.38  | 0.26         | 0.52         |
| Australia        | $V_W$    | 0.37  | 0.29         | 0.45         |
| Hawaii           | R        | 0.44  | 0.28         | 0.58         |
| Hawaii           | $V_A$    | 0.57  | 0.33         | 0.84         |
| Hawaii           | $V_W$    | 0.62  | 0.46         | 0.80         |
| Lord Howe Island | R        | 0.31  | 0.12         | 0.50         |
| Lord Howe Island | $V_A$    | 0.32  | 0.10         | 0.54         |
| Lord Howe Island | $V_W$    | 0.60  | 0.43         | 0.81         |
| New Zealand      | R        | 0.09  | 0.00         | 0.22         |
| New Zealand      | $V_A$    | 0.08  | 0.00         | 0.20         |
| New Zealand      | $V_W$    | 0.73  | 0.57         | 0.90         |

**Supplementary Table 11.** Adjusted repeatability (R) and variance estimates (i.e., among-individual [ $V_A$ ] and within-individual [ $V_W$ ]) for boldness in Australia ( $n = 167$  skinks), and Hawaii ( $n = 118$ ) Lord Howe Island ( $n = 92$ ), and New Zealand ( $n = 143$ ).

| Region           | Estimate | Value | Lower 95% CI | Upper 95% CI |
|------------------|----------|-------|--------------|--------------|
| Australia        | R        | 0.58  | 0.46         | 0.70         |
| Australia        | $V_A$    | 0.38  | 0.26         | 0.51         |
| Australia        | $V_W$    | 0.25  | 0.19         | 0.31         |
| Hawaii           | R        | 0.29  | 0.10         | 0.47         |
| Hawaii           | $V_A$    | 0.23  | 0.07         | 0.40         |
| Hawaii           | $V_W$    | 0.53  | 0.39         | 0.69         |
| Lord Howe Island | R        | 0.10  | 0.00         | 0.30         |
| Lord Howe Island | $V_A$    | 0.12  | 0.00         | 0.35         |
| Lord Howe Island | $V_W$    | 1.00  | 0.68         | 1.33         |
| New Zealand      | R        | 0.42  | 0.27         | 0.56         |
| New Zealand      | $V_A$    | 0.57  | 0.32         | 0.83         |
| New Zealand      | $V_W$    | 0.75  | 0.58         | 0.95         |

**Supplementary Table 12.** Model comparison table comparing the relative fits of four models investigating differences in exploratory behavior between native Tenterfield population, and individual invasive New Zealand populations (Auckland, Hamilton, Whangarei, and Edgecumbe).

| <b>Model</b>   | <b>WAIC</b> | <b>Se WAIC</b> | <b><math>\Delta</math> WAIC</b> | <b>LOO</b> | <b>Se LOO</b> | <b><math>\Delta</math> LOO</b> |
|----------------|-------------|----------------|---------------------------------|------------|---------------|--------------------------------|
| Both variance  | 696.4       | 39.8           | 0                               | 713.0      | 41.5          | 0                              |
| Within model   | 706.6       | 39.0           | -10.2                           | 719.7      | 40.7          | -6.7                           |
| Among<br>model | 724.3       | 42.7           | -27.9                           | 729.6      | 42.6          | -16.6                          |
| Null<br>model  | 728.9       | 41.1           | -32.5                           | 734.2      | 41.6          | -21.2                          |

**Supplementary Table 13.** Model comparison table comparing the relative fits of four models investigating differences in activity rates between native Tenterfield population, and individual invasive New Zealand populations (Auckland, Hamilton, Whangarei, and Edgumbe).

| <b>Model</b>   | <b>WAIC</b> | <b>Se WAIC</b> | <b><math>\Delta</math> WAIC</b> | <b>LOO</b> | <b>Se LOO</b> | <b><math>\Delta</math> LOO</b> |
|----------------|-------------|----------------|---------------------------------|------------|---------------|--------------------------------|
| Both variance  | 873.4       | 25.8           | 0                               | 882.5      | 26.4          | 0                              |
| Among<br>model | 878.1       | 25.3           | -4.7                            | 883.5      | 25.7          | -1                             |
| Within model   | 889.4       | 26.1           | -16.0                           | 895.1      | 26.6          | -12.6                          |
| Null<br>model  | 891.5       | 26.3           | -18.1                           | 895.2      | 26.7          | -12.7                          |

**Supplementary Table 14.** Model comparison table comparing the relative fits of four models investigating differences in boldness between native Tenterfield population, and individual invasive New Zealand populations (Auckland, Hamilton, Whangarei, and Edgumbe).

| <b>Model</b>   | <b>WAIC</b> | <b>Se WAIC</b> | <b><math>\Delta</math> WAIC</b> | <b>LOO</b> | <b>Se LOO</b> | <b><math>\Delta</math> LOO</b> |
|----------------|-------------|----------------|---------------------------------|------------|---------------|--------------------------------|
| Within model   | 742.9       | 21.7           | 0                               | 764.8      | 22.5          | 0                              |
| Both variance  | 749.4       | 21.6           | -6.5                            | 769.6      | 22.2          | -4.8                           |
| Null model     | 791.0       | 20.3           | -48.1                           | 809.1      | 21.4          | -44.3                          |
| Among<br>model | 799.3       | 19.9           | -56.4                           | 814.9      | 20.8          | -50.1                          |



**Supplementary Table 15.** Model summary of average differences in exploratory behavior between the native Tenterfield population (i.e., intercept;  $n = 30$  skinks), and individual invasive New Zealand populations (Auckland [established 1960;  $n = 31$ ], Hamilton [established 1978;  $n = 43$ ], Whangarei [established 2002;  $n = 33$ ], and Edgecumbe [established 2007;  $n = 36$ ]).

| Term      | Estimate      | SE           | Lower 95% CI  | Upper 95% CI  |
|-----------|---------------|--------------|---------------|---------------|
| Intercept | <b>-1.284</b> | <b>0.085</b> | <b>-1.450</b> | <b>-1.111</b> |
| Auckland  | <b>1.625</b>  | <b>0.154</b> | <b>1.321</b>  | <b>1.930</b>  |
| Hamilton  | <b>1.266</b>  | <b>0.161</b> | <b>0.945</b>  | <b>1.584</b>  |
| Whangarei | <b>1.700</b>  | <b>0.141</b> | <b>1.413</b>  | <b>1.974</b>  |
| Edgecumbe | <b>1.638</b>  | <b>0.120</b> | <b>1.402</b>  | <b>1.873</b>  |

Estimates in bold are those with 95% CI's that did not include zero.

**Supplementary Table 16.** Model summary of average differences in activity between the native Tenterfield population (i.e., intercept;  $n = 30$  skinks), and individual invasive New Zealand populations (Auckland [established 1960;  $n = 31$ ], Hamilton [established 1978;  $n = 43$ ], Whangarei [established 2002;  $n = 33$ ], and Edgecumbe [established 2007;  $n = 36$ ]).

| Term      | Estimate      | SE           | Lower 95% CI  | Upper 95% CI  |
|-----------|---------------|--------------|---------------|---------------|
| Intercept | <b>-0.632</b> | <b>0.134</b> | <b>-0.895</b> | <b>-0.362</b> |
| Auckland  | <b>0.471</b>  | <b>0.217</b> | <b>0.048</b>  | <b>0.899</b>  |
| Hamilton  | <b>0.542</b>  | <b>0.183</b> | <b>0.179</b>  | <b>0.899</b>  |
| Whangarei | <b>0.816</b>  | <b>0.176</b> | <b>0.466</b>  | <b>1.161</b>  |
| Edgecumbe | <b>1.133</b>  | <b>0.161</b> | <b>0.814</b>  | <b>1.445</b>  |

Estimates in bold are those with 95% CI's that did not include zero.

**Supplementary Table 17.** Model summary of average differences in boldness between the native Tenterfield population (i.e., intercept;  $n = 30$  skinks), and individual invasive New Zealand populations (Auckland [established 1960;  $n = 31$ ], Hamilton [established 1978;  $n = 43$ ], Whangarei [established 2002;  $n = 33$ ], and Edgecumbe [established 2007;  $n = 36$ ]). Note: as boldness was measured as re-emergence latencies, lower scores indicate bolder lizards.

| Term      | Estimate      | SE           | Lower 95% CI  | Upper 95% CI  |
|-----------|---------------|--------------|---------------|---------------|
| Intercept | 0.319         | 0.121        | 0.074         | 0.550         |
| Auckland  | -0.180        | 0.187        | -0.544        | 0.188         |
| Hamilton  | <b>-0.617</b> | <b>0.214</b> | <b>-1.036</b> | <b>-0.189</b> |
| Whangarei | <b>-0.389</b> | <b>0.194</b> | <b>-0.758</b> | <b>-0.003</b> |
| Edgecumbe | <b>-0.389</b> | <b>0.191</b> | <b>-0.753</b> | <b>-0.009</b> |

Estimates in bold are those with 95% CI's that did not include zero.

**Supplementary Table 18.** Adjusted repeatability (R) and variance estimates (i.e., among-individual [ $V_A$ ] and within-individual [ $V_W$ ]) for exploratory behavior within each population in the invasive New Zealand lineage (i.e., Tenterfield [native;  $n = 30$  skinks], Auckland [established 1960;  $n = 31$ ], Hamilton [established 1978;  $n = 43$ ], Whangarei [established 2002;  $n = 33$ ], and Edgumbe [established 2007;  $n = 36$ ]).

| Region      | Estimate | Value | Lower 95% CI | Upper 95% CI |
|-------------|----------|-------|--------------|--------------|
| Tenterfield | R        | 0.45  | 0.15         | 0.75         |
| Tenterfield | $V_A$    | 0.14  | 0.00         | 0.27         |
| Tenterfield | $V_W$    | 0.16  | 0.09         | 0.26         |
| Auckland    | R        | 0.33  | 0.00         | 0.60         |
| Auckland    | $V_A$    | 0.24  | 0.00         | 0.52         |
| Auckland    | $V_W$    | 0.47  | 0.24         | 0.75         |
| Hamilton    | R        | 0.55  | 0.27         | 0.78         |
| Hamilton    | $V_A$    | 0.41  | 0.12         | 0.77         |
| Hamilton    | $V_W$    | 0.32  | 0.17         | 0.52         |
| Whangarei   | R        | 0.12  | 0.00         | 0.35         |
| Whangarei   | $V_A$    | 0.10  | 0.00         | 0.30         |
| Whangarei   | $V_W$    | 0.69  | 0.43         | 0.99         |
| Edgumbe     | R        | 0.05  | 0.00         | 0.18         |
| Edgumbe     | $V_A$    | 0.03  | 0.00         | 0.11         |
| Edgumbe     | $V_W$    | 0.54  | 0.37         | 0.72         |

**Supplementary Table 19.** Adjusted repeatability (R) and variance estimates (i.e., among-individual [ $V_A$ ] and within-individual [ $V_W$ ]) for activity within each population in the invasive New Zealand lineage (i.e., Tenterfield [native;  $n = 30$  skinks], Auckland [established 1960;  $n = 31$ ], Hamilton [established 1978;  $n = 43$ ], Whangarei [established 2002;  $n = 33$ ], and Edgecumbe [established 2007;  $n = 36$ ]).

| Region      | Estimate | Value | Lower 95% CI | Upper 95% CI |
|-------------|----------|-------|--------------|--------------|
| Tenterfield | R        | 0.46  | 0.15         | 0.75         |
| Tenterfield | $V_A$    | 0.38  | 0.00         | 0.71         |
| Tenterfield | $V_W$    | 0.43  | 0.23         | 0.69         |
| Auckland    | R        | 0.36  | 0.00         | 0.63         |
| Auckland    | $V_A$    | 0.50  | 0.00         | 1.05         |
| Auckland    | $V_W$    | 0.85  | 0.42         | 1.36         |
| Hamilton    | R        | 0.06  | 0.00         | 0.20         |
| Hamilton    | $V_A$    | 0.06  | 0.00         | 0.22         |
| Hamilton    | $V_W$    | 0.93  | 0.59         | 1.27         |
| Whangarei   | R        | 0.19  | 0.00         | 0.46         |
| Whangarei   | $V_A$    | 0.16  | 0.00         | 0.43         |
| Whangarei   | $V_W$    | 0.66  | 0.38         | 0.97         |
| Edgecumbe   | R        | 0.06  | 0.00         | 0.22         |
| Edgecumbe   | $V_A$    | 0.04  | 0.00         | 0.15         |
| Edgecumbe   | $V_W$    | 0.62  | 0.43         | 0.83         |

**Supplementary Table 20.** Adjusted repeatability (R) and variance estimates (i.e., among-individual [ $V_A$ ] and within-individual [ $V_W$ ]) for boldness within each population in the invasive New Zealand lineage (i.e., Tenterfield [native;  $n = 30$  skinks], Auckland [established 1960;  $n = 31$ ], Hamilton [established 1978;  $n = 43$ ], Whangarei [established 2002;  $n = 33$ ], and Edgecumbe [established 2007;  $n = 36$ ]).

| Region      | Estimate | Value | Lower 95% CI | Upper 95% CI |
|-------------|----------|-------|--------------|--------------|
| Tenterfield | R        | 0.79  | 0.65         | 0.91         |
| Tenterfield | $V_A$    | 0.42  | 0.20         | 0.69         |
| Tenterfield | $V_W$    | 0.10  | 0.06         | 0.16         |
| Auckland    | R        | 0.21  | 0.00         | 0.49         |
| Auckland    | $V_A$    | 0.23  | 0.00         | 0.59         |
| Auckland    | $V_W$    | 0.81  | 0.45         | 1.24         |
| Hamilton    | R        | 0.53  | 0.24         | 0.80         |
| Hamilton    | $V_A$    | 0.65  | 0.15         | 1.26         |
| Hamilton    | $V_W$    | 0.54  | 0.27         | 0.89         |
| Whangarei   | R        | 0.28  | 0.00         | 0.55         |
| Whangarei   | $V_A$    | 0.33  | 0.00         | 0.78         |
| Whangarei   | $V_W$    | 0.82  | 0.45         | 1.27         |
| Edgecumbe   | R        | 0.49  | 0.25         | 0.73         |
| Edgecumbe   | $V_A$    | 0.61  | 0.20         | 1.10         |
| Edgecumbe   | $V_W$    | 0.60  | 0.35         | 0.90         |

**Supplementary Table 21.** The effect size ( $\pm$  95 % CI) of the magnitude difference in among-individual variation ( $\Delta V_A$ ), within-individual variation ( $\Delta V_W$ ), and repeatability ( $\Delta R$ ) of exploration, activity, and boldness for each population in the invasive New Zealand lineage (i.e., Tenterfield [AUS;  $n = 30$  skinks], Auckland [AUK;  $n = 31$ ], Hamilton [HAM;  $n = 43$ ], Whangarei [WGI;  $n = 33$ ], and Edgecumbe [EDG;  $n = 36$ ]).

| Contrast  | Exploration            |                                       |                                    | Activity               |                                       |                                    | Boldness               |                                       |                                    |
|-----------|------------------------|---------------------------------------|------------------------------------|------------------------|---------------------------------------|------------------------------------|------------------------|---------------------------------------|------------------------------------|
|           | $\Delta V_A$           | $\Delta V_W$                          | $\Delta R$                         | $\Delta V_A$           | $\Delta V_W$                          | $\Delta R$                         | $\Delta V_A$           | $\Delta V_W$                          | $\Delta R$                         |
| AUS – AUK | -0.10<br>(-0.44, 0.21) | <b>-0.31</b><br><b>(-0.61, -0.04)</b> | 0.13<br>(-0.31, 0.59)              | -0.12<br>(-0.86, 0.54) | -0.42<br>(-1.04, 0.09)                | 0.10<br>(-0.34, 0.58)              | 0.19<br>(-0.31, 0.62)  | <b>-0.71</b><br><b>(-1.14, -0.33)</b> | <b>0.57</b><br><b>(0.25, 0.88)</b> |
| AUS – HAM | -0.27<br>(-0.63, 0.09) | -0.16<br>(-0.38, 0.04)                | -0.10<br>(-0.50, 0.31)             | 0.32<br>(-0.07, 0.72)  | <b>-0.50</b><br><b>(-0.94, -0.06)</b> | <b>0.40</b><br><b>(0.04, 0.70)</b> | -0.23<br>(-0.89, 0.39) | <b>-0.44</b><br><b>(-0.79, -0.15)</b> | 0.26<br>(-0.05, 0.60)              |
| AUS – WGI | 0.05<br>(-0.21, 0.27)  | <b>-0.53</b><br><b>(-0.84, -0.23)</b> | 0.34<br>(-0.06, 0.67)              | 0.22<br>(-0.26, 0.69)  | -0.24<br>(-0.63, 0.17)                | 0.27<br>(-0.16, 0.65)              | 0.09<br>(-0.46, 0.61)  | <b>-0.72</b><br><b>(-1.16, -0.32)</b> | <b>0.51</b><br><b>(0.18, 0.84)</b> |
| AUS – EDG | 0.12<br>(-0.04, 0.28)  | <b>-0.37</b><br><b>(-0.57, -0.17)</b> | <b>0.40</b><br><b>(0.05, 0.69)</b> | 0.33<br>(-0.02, 0.72)  | -0.19<br>(-0.51, 0.14)                | <b>0.39</b><br><b>(0.03, 0.70)</b> | -0.19<br>(-0.74, 0.33) | <b>-0.50</b><br><b>(-0.80, -0.24)</b> | <b>0.30</b><br><b>(0.02, 0.59)</b> |
| AUK – HAM | -0.17<br>(-0.63, 0.28) | 0.15<br>(-0.17, 0.51)                 | -0.22<br>(-0.67, 0.18)             | 0.44<br>(-0.09, 1.09)  | -0.08<br>(-0.69, 0.55)                | 0.30<br>(-0.04, 0.66)              | -0.42<br>(-1.15, 0.23) | 0.27<br>(-0.27, 0.82)                 | -0.32<br>(-0.71, 0.10)             |
| AUK – WGI | 0.15<br>(-0.22, 0.53)  | -0.22<br>(-0.62, 0.18)                | 0.21<br>(-0.19, 0.60)              | 0.34<br>(-0.30, 1.03)  | 0.18<br>(-0.36, 0.83)                 | 0.17<br>(-0.29, 0.60)              | -0.10<br>(-0.73, 0.50) | -0.01<br>(-0.62, 0.61)                | -0.06<br>(-0.49, 0.39)             |
| AUK – EDG | 0.21<br>(-0.06, 0.54)  | -0.06<br>(-0.39, 0.27)                | 0.28<br>(-0.06, 0.62)              | 0.45<br>(-0.06, 1.07)  | 0.23<br>(-0.25, 0.82)                 | 0.29<br>(-0.07, 0.63)              | -0.38<br>(-0.98, 0.22) | 0.21<br>(-0.27, 0.75)                 | -0.28<br>(-0.66, 0.09)             |

|           |                                    |                                       |                                    |                        |                       |                        |                        |                        |                        |
|-----------|------------------------------------|---------------------------------------|------------------------------------|------------------------|-----------------------|------------------------|------------------------|------------------------|------------------------|
| HAM – WGI | 0.32<br>(-0.06, 0.73)              | <b>-0.37</b><br><b>(-0.74, -0.04)</b> | <b>0.43</b><br><b>(0.08, 0.75)</b> | -0.10<br>(-0.47, 0.20) | 0.26<br>(-0.20, 0.74) | -0.13<br>(-0.47, 0.16) | 0.32<br>(-0.44, 1.05)  | -0.28<br>(-0.87, 0.25) | 0.25<br>(-0.16, 0.68)  |
| HAM – EDG | <b>0.38</b><br><b>(0.08, 0.75)</b> | -0.21<br>(-0.47, 0.06)                | <b>0.50</b><br><b>(0.19, 0.77)</b> | 0.01<br>(-0.16, 0.23)  | 0.31<br>(-0.08, 0.74) | -0.01<br>(-0.24, 0.19) | 0.04<br>(-0.67, 0.80)  | -0.06<br>(-0.52, 0.41) | 0.04<br>(-0.35, 0.41)  |
| WGI – EDG | 0.07<br>(-0.11, 0.31)              | 0.15<br>(-0.20, 0.49)                 | 0.07<br>(-0.16, 0.36)              | 0.12<br>(-0.13, 0.45)  | 0.05<br>(-0.34, 0.41) | 0.12<br>(-0.16, 0.47)  | -0.28<br>(-0.91, 0.41) | 0.22<br>(-0.30, 0.77)  | -0.22<br>(-0.60, 0.19) |

Contrasts in bold are those with 95% CI's that did not include zero.
